# Supplementary material for: Enhanced room-temperature ethanol sensing performance of porous MoO3/V0.13Mo0.87O2.935 heterostructures self-assembled with 2D nanosheets
Source: Royal Society of Chemistry journal article supplement (doi:10.1039/d1ce00311a), 2021-01-01
Supplement: d1ce00311a1.pdf [file d1ce00311a1.pdf]

## Electronic Supplementary Information

### **Enhanced room-temperature ethanol sensing performance of porous $\text{MoO}_3/\text{V}_{0.13}\text{Mo}_{0.87}\text{O}_{2.935}$ heterostructures self-assembled with 2D nanosheets**

Jia Guo, Hang Li, Shushu Chu, Qi Zhang, Ziqiong Lin, Qian Ma\*

School of Material Science and Engineering, University of Jinan, 250022, Jinan, P. R. China

\*To whom correspondence should be addressed.

E-mail: [mse\\_maq@ujn.edu.cn](mailto:mse_maq@ujn.edu.cn)

Fax: +86-531-87974453, Tel: +86-531-89736225

## Materials

Ammonium molybdate tetrahydrate ((NH<sub>4</sub>)<sub>6</sub>Mo<sub>7</sub>O<sub>24</sub>·4H<sub>2</sub>O, AR, Aladdin Reagent Company), ammonium metavanadate (NH<sub>4</sub>VO<sub>3</sub>, AR, Tianjin Guangfu Fine Chemical Research Institute), ethanol (CH<sub>3</sub>CH<sub>2</sub>OH, AR, Tianjin Chemical Reagent Institute), and ethanolamine (C<sub>2</sub>H<sub>7</sub>NO, AR, Sinopharm Chemical Reagent Company) were reagent grade without further purification.

## Characterization

Crystalline structures of various samples were measured by an X-ray diffractometer (XRD, D8-ADVANCE of Bruker Corporation, Cu K $\alpha$  radiation source of  $\lambda = 1.54186$  Å) in the  $2\theta$  range of 15 to 80°. The morphologies of different samples were tested by the field-emission scanning electron microscope (FESEM, QUANTA 260 FEG, FEI, U.S.A.) and transmission electron microscopy (TEM/HRTEM, Tecnai F20, FEI). Surface chemical analysis can be investigated by the X-ray photoelectron spectroscopy (XPS, ESCALAB 260). Raman spectra were conducted by the high-resolution Raman spectrometer (LabRAM HR Evolution, HORIBA JOBIN YVON SAS). UV-vis diffuse reflectance spectra were obtained in UV-vis spectrometer (Hitachi U-4100). The specific surface area and pore size distribution were acquired by the multifunction adsorption instrument (MFA-140, Builder Company, Beijing).

## Gas-sensing measurement

CGS-4TPs (Beijing Elite Tech Co., Ltd.) was employed for estimating the gas-sensing performances of different samples. The as-prepared powders were mixed with the deionized water to form a paste, which was coated on the Ag-Pd interdigital electrodes. The sensor was kept drying at room temperature for 12 h to improve the stability. Gas response was defined as  $|R_a - R_g|/R_a \times 100\%$ , where  $R_a$  and  $R_g$  are measured as the resistance of sensors in air and in target gas, respectively.

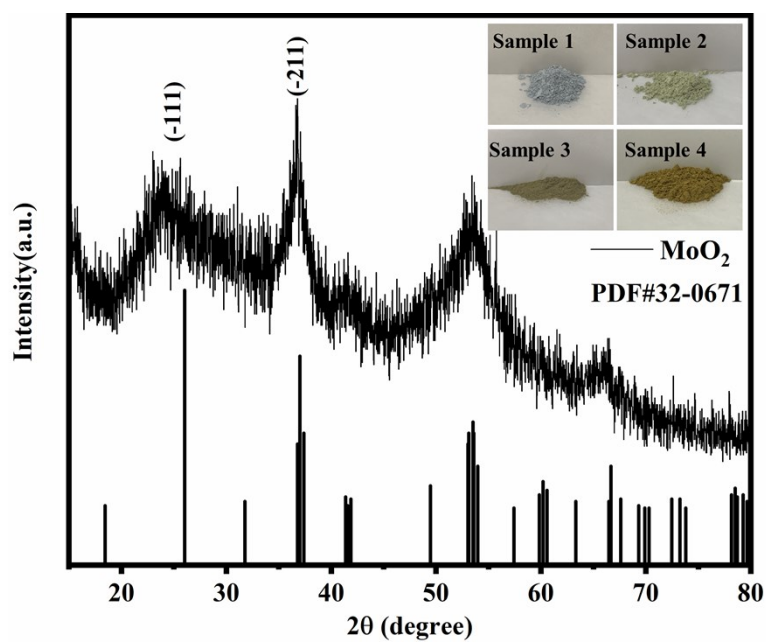

**Fig. S1.** XRD pattern of MoO<sub>2</sub> precursors.

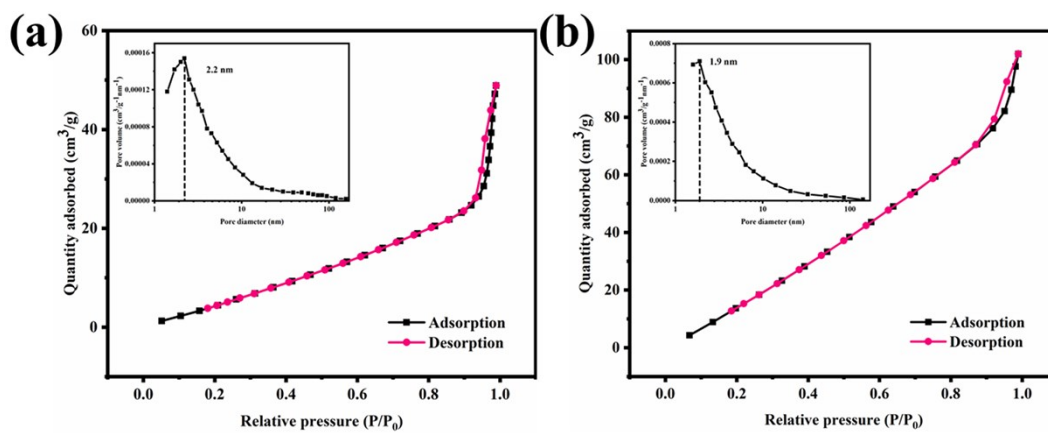

**Fig. S2.** Nitrogen adsorption/desorption isotherms and the inset pore size distributions of (a) Sample 1 and (b) Sample 3.

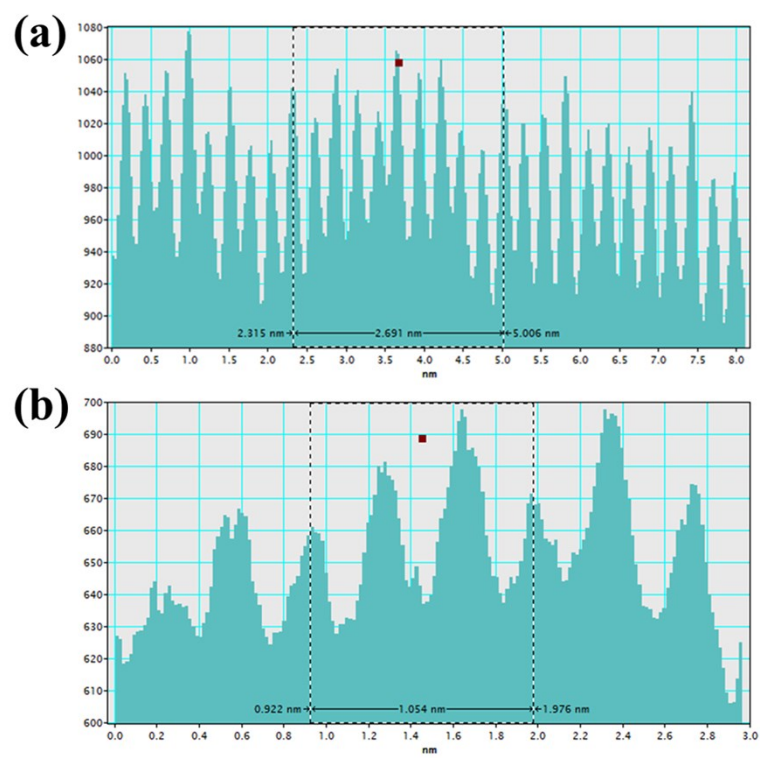

**Fig. S3.** The lattice spacings of (a) MoO<sub>3</sub> (101) and (b) V<sub>0.13</sub>Mo<sub>0.87</sub>O<sub>2.935</sub> (210) in Sample 3.

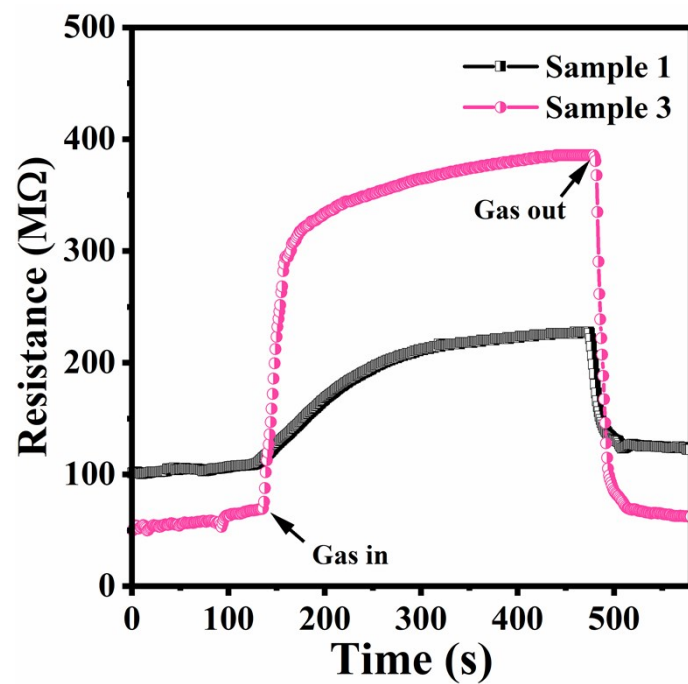

**Fig. S4.** The resistance variation of Sample 1 and 3 to 100 ppm ethanol at different operating temperatures

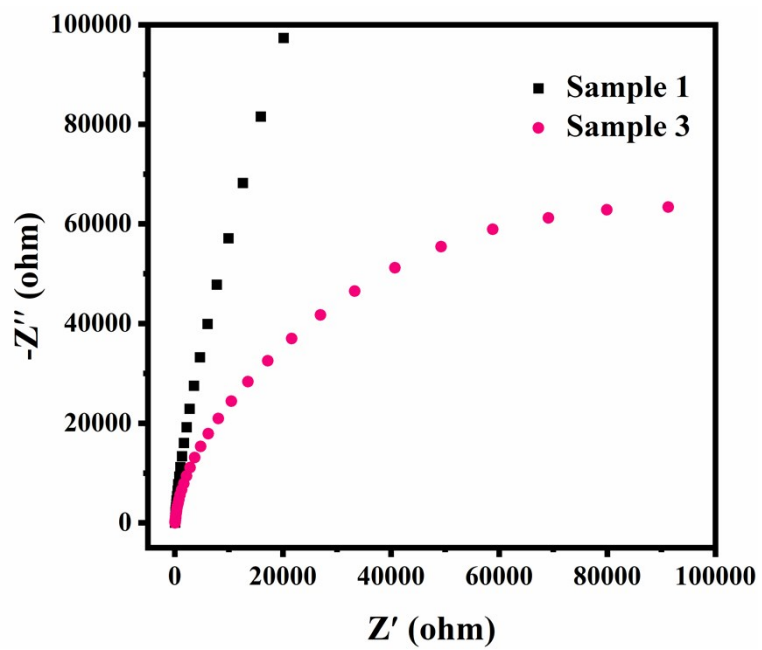

Fig. S5. Electrochemical impedance spectroscopy of Sample 1 and 3.

**Table S1** Comparison of ethanol sensing characteristics of MoO<sub>3</sub>-based sensors.

| Samples                                                                                | Concentration (ppm) | Temperature (°C) | Response | Response/recovery time (s) | References |
|----------------------------------------------------------------------------------------|---------------------|------------------|----------|----------------------------|------------|
| MoO <sub>3</sub> microboxes                                                            | 100                 | 260              | 78       | 15/5 s                     | S1         |
| C/A-C/S MoO <sub>3</sub> nanorods                                                      | 500                 | 180              | 56       | -/-                        | S2         |
| $\alpha$ -MoO <sub>3</sub> /ZnO nanobelts                                              | 100                 | 250              | 19       | 2.5/5 s                    | S3         |
| Zn doped MoO <sub>3</sub> nanobelts                                                    | 5                   | 240              | 2.4      | 46/76 s                    | S4         |
| MoO <sub>3</sub> -rGO nanoflakes                                                       | 100                 | 310              | 53       | 6/54 s                     | S5         |
| MoO <sub>3</sub> /In <sub>2</sub> O <sub>3</sub> nanoflowers                           | 100                 | 185              | 7        | 11/94 s                    | S6         |
| MoO <sub>3</sub> /V <sub>0.13</sub> Mo <sub>0.87</sub> O <sub>2.935</sub> microspheres | 100                 | 30               | 480 %    | 124.8/17.6 s               | This work  |



## References

- S1 J. Zhang, P. Song, J. Li, Z. X. Yang and Q. Wang, *Sens. Actuators, B*, 2017, **249**, 458-466.
- S2 L. Q. Wang, P. Gao, D. Bao, Y. Wang, Y. J. Chen, C. Chang, G. B. Li and P. P. Yang, *Cryst. Growth Des.*, 2014, **14**, 569-575.
- S3 J. T. Li, H. J. Liu, H. Fu, L. Xu, H. Jin, X. W. Zhang, L. W. Wang and K. F. Yu, *J. Alloys Compd.*, 2019, **788**, 248-256.
- S4 S. Yang, Y. L. Liu, T. Chen, W. Jin, T. Q. Yang, M. C. Cao, S. S. Liu, J. Zhou, G.S. Zakharova and W. Chen, *Appl. Surf. Sci.*, 2017, **393**, 377-384.
- S5 Z. L. Tang, X. C. Deng, Y. Zhang, X. D. Guo, J. Q. Yang, C. L. Zhu, J. fan, Y. F. Shi, B. J. Qing and F. Y. Fan, *Sens. Actuators, B*, 2019, **297**, 126730.
- S6 J. Hu, X. Wang, M. Zhang, Y. J. Sun, P. W. Li, W. D. Zhang, K. Lian, L. Chen and Y. Chen, *RSC Adv.*, 2017, **7**, 23478-23485.
